# Supplementary material for: Nanoporous Ni current collectors with cone array supported Sn–Co alloys as anodes for high-performance lithium-ion batteries
Source: Royal Society of Chemistry journal article supplement (doi:10.1039/d4ta04219k), 2024-01-01
Supplement: d4ta04219k1.pdf [file d4ta04219k1.pdf]

## Supplementary Information

### **Nanoporous Ni current collectors with cone array supported Sn-Co alloys as anodes for high-performance lithium-ion batteries**

*Hong Kang<sup>a, ‡</sup>, Huanyan Liu<sup>a, ‡</sup>, Hongmei Gou<sup>a</sup>, Shichao Zhang<sup>b</sup> and Wenbo Liu<sup>a,\*</sup>*

<sup>a</sup> School of Mechanical Engineering, Sichuan University, Chengdu 610065, China

<sup>b</sup> School of Materials Science and Engineering, Beihang University, Beijing 100191,  
China

*‡* These authors contributed equally to this work.

\* Corresponding author. E-mail: liuwenbo\_8338@163.com.

**Table S1.** A detailed comparison of lithium storage properties of nanoporous Sn-Co alloy electrodes with cone arrays with other various Sn-based composites with different structure designs reported in the literature.

| Materials                                                  | Structure                | Current density<br>(mA cm <sup>-2</sup> ) | Reversible capacity<br>(mAh cm <sup>-2</sup> ) | Cycles | Capacity retention<br>(%) | Ref.     |
|------------------------------------------------------------|--------------------------|-------------------------------------------|------------------------------------------------|--------|---------------------------|----------|
| Sn                                                         | nanoparticle             | 500                                       | 1.29                                           | 100    | 35.4                      | 1        |
| SnO <sub>2</sub> /Cu <sub>10</sub> S<br>n <sub>3</sub> /Cu | powder                   | 100                                       | 0.25                                           | 50     | 45.5                      | 2        |
| Sn-Ni                                                      | nanoparticle             | 0.10                                      | 0.25                                           | 200    | 51                        | 3        |
| Sn                                                         | nanoparticle             | 0.1                                       | 0.49                                           | 500    | 52.4                      | 4        |
| SnSb/N-C                                                   | nanosheet                | 0.12                                      | 0.32                                           | 100    | 79.6                      | 5        |
| C@Sn@C                                                     | nanofiber                | 0.10                                      | 0.14                                           | 100    | 62.2                      | 6        |
| CF/Sn   Sn<br>O <sub>2</sub> @C                            | submicron<br>particle    | 0.28                                      | 1.84                                           | 50     | 76.5                      | 7        |
| Co-Sn/Ni                                                   | isolated<br>particle     | 0.70                                      | 1.00                                           | 85     | 31.3                      | 8        |
| Co-Sn/Ti                                                   | microparticle            | 0.2                                       | 0.10                                           | 30     | 50                        | 9        |
| Sn-Co                                                      | nanowire                 | 0.126                                     | 0.32                                           | 200    | 80                        | 10       |
| Sn-Co                                                      | nanoporous<br>cone array | 1                                         | 0.89                                           | 200    | 139                       | Our work |

CF: Copper foam.

## References

- 1 Z. Luo, J. C. Xu, B. Yuan, H. Li, R. Z. Hu, L. C. Yang, Y. Gao, M. Zhu, *Mater. Lett.*, 2018, **213**, 189–192.
- 2 H. Park, J. H. Um, H. Choi, W. S. Yoon, Y. E. Sung, H. Choe, *Appl. Surf. Sci.*, 2017, **399**, 132–138.
- 3 X. Dong, W. Liu, X. Chen, J. Yan, N. Li, S. Shi, S. Zhang, X. Yang, *Chem. Eng. J.*, 2018, **350**, 791–798.

- 4 W. Liu, X. Chen, P. Xiang, S. Zhang, J. Yan, N. Li, S. Shi, *Nanoscale*, 2019, **11**, 4885–4894.
- 5 Q. Pan, Y. Wu, F. Zheng, X. Ou, C. Yang, X. Xiong, M. Liu, *Chem. Eng. J.*, 2018, **348**, 653–660.
- 6 X. Wang, K. Gao, X. Ye, X. Huang, B. Shi, *Chem. Eng. J.*, 2018, **344**, 625–632.
- 7 J. Ding, W. Zhu, C. Liu, C. Ma, Y. Yang, H. Ji, G. Yang, *J. Alloys Compd.*, 2018, **750**, 220–227.
- 8 J. R. González, F. Nacimiento, R. Alcántara, G. F. Ortiz, J. L. Tirado, *CrystEngComm.*, 2013, **15**, 9196–9202.
- 9 F. Nacimiento, R. Alcántara, J. R. González, J. L. Tirado, *J. Electrochem. Soc.*, 2012, **159**, A1028.
- 10 G. Ferrara, C. Arbizzani, L. Damen, M. Guidotti, M. Lazzari, F. G. Vergottini, R. Inguanta, S. Piazza, C. Sunseri, M. Mastragostino, *J. Power Sources*, 2012, **211**, 103–107.
